# Supplementary material for: Endothelium-Independent Vasodilatory Effects of Isodillapiolglycol Isolated from Ostericum citriodorum
Source: MDPI journal article supplement (doi:10.3390/molecules25040885), 2020-02-17
Supplement: s1 [file s1]

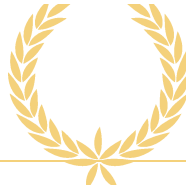

We certify that the following article

Endothelium-independent vasodilatory effects of isodillapiolglycol isolated from  
*Ostericum citriodorum*

tengshuo lu

has undergone English language editing by MDPI. The text has been checked for correct use of grammar and common technical terms, and edited to a level suitable for reporting research in a scholarly journal.

MDPI uses experienced, native English speaking editors. Full details of the editing service can be found at

► <https://www.mdpi.com/authors/english>.
