# Supplementary material for: Endothelium-Independent Vasodilatory Effects of Isodillapiolglycol Isolated from Ostericum citriodorum
Source: Molecules. 2020 Feb 17;25(4):885. doi: 10.3390/molecules25040885 (PMC7070945; doi:10.3390/molecules25040885)
Supplement: Supplementary file 1 [file molecules-25-00885-s001.zip]

Archive with 4 entries (4 files):
- English-editing-certificate-tengshuo luo.pdf
- Response to Reviewers.docx
- Supplementary Materials for compound details.docx
- Supplementary Materials for vasodilatory effects of isodillapiolglycol.docx
